Local trauma is always a potential hazard with any manipulation in the laryngotracheal region; however, in our experience, the use of the gum-elastic bougie is not associated with soft tissue damage provided excessive force is not applied.

The bougie has also been found helpful in changing the ETT in patients who require prolonged endotracheal intubation. The bougie is passed through the ETT that is in place. The tube is then removed over the bougie and the new tube introduced.

Although most anesthesiologists are becoming very adept at using the fiber-optic laryngoscope for difficult intubations, in the situation where there is unexpected

difficulty, we feel there should be a bougie readily available.

S. MÁIRE MCCARROLL, F.F.A.R.C.S.I.  
BRIAN J. LAMONT, F.F.A.R.C.S.I.  
MARK R. BUCKLAND, F.F.A.R.A.C.S.  
ALAN P. B. YATES, F.F.A.R.C.S.  
*Visiting Assistant Professors  
Department of Anesthesiology  
University of Texas Southwestern  
Medical Center at Dallas  
5323 Harry Hines Boulevard  
Dallas, Texas 75235*

(Accepted for publication December 3, 1987.)

Anesthesiology  
68:644, 1988

### The Effect of a Second Dose of Succinylcholine on Cardiac Rate and Rhythm Following Induction of Anesthesia with Ketamine

*To the Editor:*—We recently reported that marked bradydysrhythmias may occur following a second dose of succinylcholine (SCh) after induction of anesthesia with midazolam or etomidate, and that the occurrence of these dysrhythmias was statistically significant after induction with etomidate.<sup>1</sup> We showed, in agreement with the findings of others, that the use of thiopental for anesthetic induction protects against the occurrence of such dysrhythmias.<sup>2,3</sup> The study has since been extended to define the effect of a second dose of SCh following induction of anesthesia with ketamine.

Eight ASA physical status I patients with a mean age of 35 yr (range 20–64) were studied. Approval of the Human Subjects Protection Committee at our institution and informed consent were obtained. The study protocol was the same as previously reported. Anesthesia was induced with ketamine 2 mg/kg iv. A second dose of SCh (0.5 mg/kg) was given 5 min after the first SCh injection. Paired Student's *t* test was used for statistical analysis, with  $P < 0.05$  considered to be significant.

We found that, following induction of anesthesia with ketamine, the decrease in HR after the second dose of SCh was not significant as compared with HR immediately prior to the second injection. No patient exhibited any dysrhythmias (table 1).

TABLE 1. Effect of Second Dose of Succinylcholine on Cardiac Rate and Rhythm

| Group             | Age (Yr) | Baseline HR | HR Before 2nd SCh | Minimum HR After 2nd SCh | Rhythm After 2nd SCh    |
|-------------------|----------|-------------|-------------------|--------------------------|-------------------------|
| Ketamine<br>n = 8 | 35 ± 15  | 78 ± 11     | 105 ± 15          | 92 ± 24                  | ● Sinus rhythm (n = 8). |

Values are mean ± SD; n = number of patients; HR = heart rate (bpm); SCh = succinylcholine.

Ketamine produces a sympathomimetic effect primarily by direct stimulation of CNS structures.<sup>4</sup> It seems reasonable to assume that the observed protective effect of ketamine against SCh-induced dysrhythmias and lack of significant decrease in HR after a second dose of SCh following induction with ketamine are due to its sympathomimetic actions.

In summary, we found that administration of a second dose of succinylcholine to healthy adult patients after induction with ketamine is safe with respect to cardiac rate and rhythm.

DANIEL H. SEARS, M.D.  
*Fellow in Anesthesiology*  
IMAD H. ABDUL-RASOOL, M.D., PH.D.  
*Assistant Professor of Anesthesiology*  
RONALD L. KATZ, M.D.  
*Professor and Chairman of Anesthesiology*  
*UCLA School of Medicine*  
*10833 Le Conte Avenue*  
*Los Angeles, California 90024-1778*

#### REFERENCES

1. Abdul-Rasool IH, Sears DH, Katz RL: The effect of a second dose of succinylcholine on cardiac rate and rhythm following induction of anesthesia with etomidate or midazolam. *ANESTHESIOLOGY* 67:795–797, 1987
2. Williams CH, Deutsch S, Linde HW, Bullough JW, Dripps RD: Effects of intravenously administered succinylcholine on cardiac rate, rhythm and arterial blood pressure in anesthetized man. *ANESTHESIOLOGY* 22:947–954, 1961
3. Schoenstadt DA, Whitcher CE: Observations on the mechanisms of succinylcholine-induced cardiac arrhythmias. *ANESTHESIOLOGY* 24:358–362, 1962
4. White PF, Way WL, Trevor AJ: Ketamine—Its pharmacology and therapeutic uses. *ANESTHESIOLOGY* 56:119–136, 1982

(Accepted for publication December 3, 1987.)
